# Supplementary material for: Solving the biofouling problem of uranium extraction from seawater by plasma technology
Source: Royal Society of Chemistry journal article supplement (doi:10.1039/d4ew00226a), 2024-01-01
Supplement: d4ew00226a1.pdf [file d4ew00226a1.pdf]

## **Solving Biofouling Problem of Uranium Extraction from Seawater by Plasma Technology**

Xue Zhang, Dadong Shao\*

School of Environmental and Biological Engineering, Nanjing University of Science and  
Technology, Nanjing 210094, P R China

Corresponding author. E-mail: shaodadong@126.com

**Supplemental Information, 7 Pages, 7 Figures**

## List of Supplemental Information Contents

|                                                                                                    |      |
|----------------------------------------------------------------------------------------------------|------|
| Fig. S1. Schematic diagram of plasma treatment system.....                                         | PS-3 |
| Fig. S2. Effect of treating time on SEM images of <i>V. alginolyticus</i> in PBS solution....      | PS-4 |
| Fig. S3. Effect of treating time on SEM images of <i>V. alginolyticus</i> on PAO surface....       | PS-5 |
| Fig. S4. Effect of treating time on K <sup>+</sup> concentration and pH value in PBS solution..... | PS-5 |
| Fig. S5. Effect of treating time on 3D-EEM spectra of <i>V. alginolyticus</i> EPS.....             | PS-6 |
| Fig. S6. Relative abundance of seawater before and after plasma treatment.....                     | PS-6 |
| Fig. S7. Heatmap of dominant species in seawater before and after plasma treatment.....            | PS-7 |

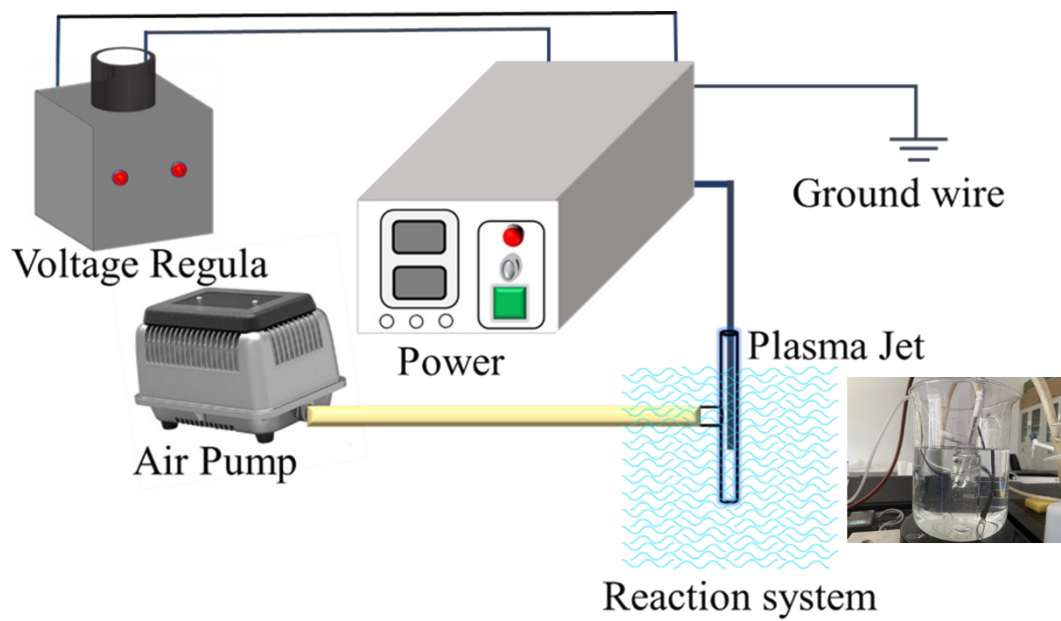

**Fig. S1.** Schematic diagram of plasma treatment system.

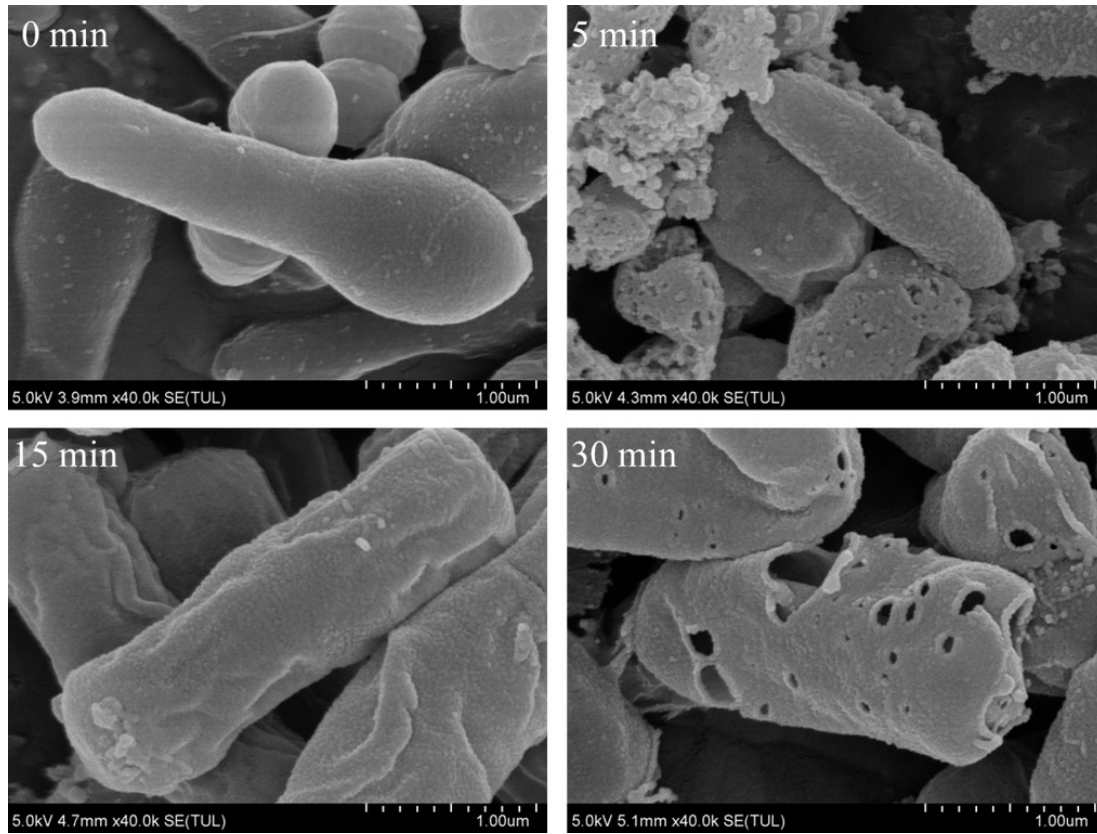

**Fig. S2.** Effect of treating time on SEM images of *V. alginolyticus* in PBS solution.  $C[V. alginolyticus] = 1.0 \times 10^8$  CFU/mL.

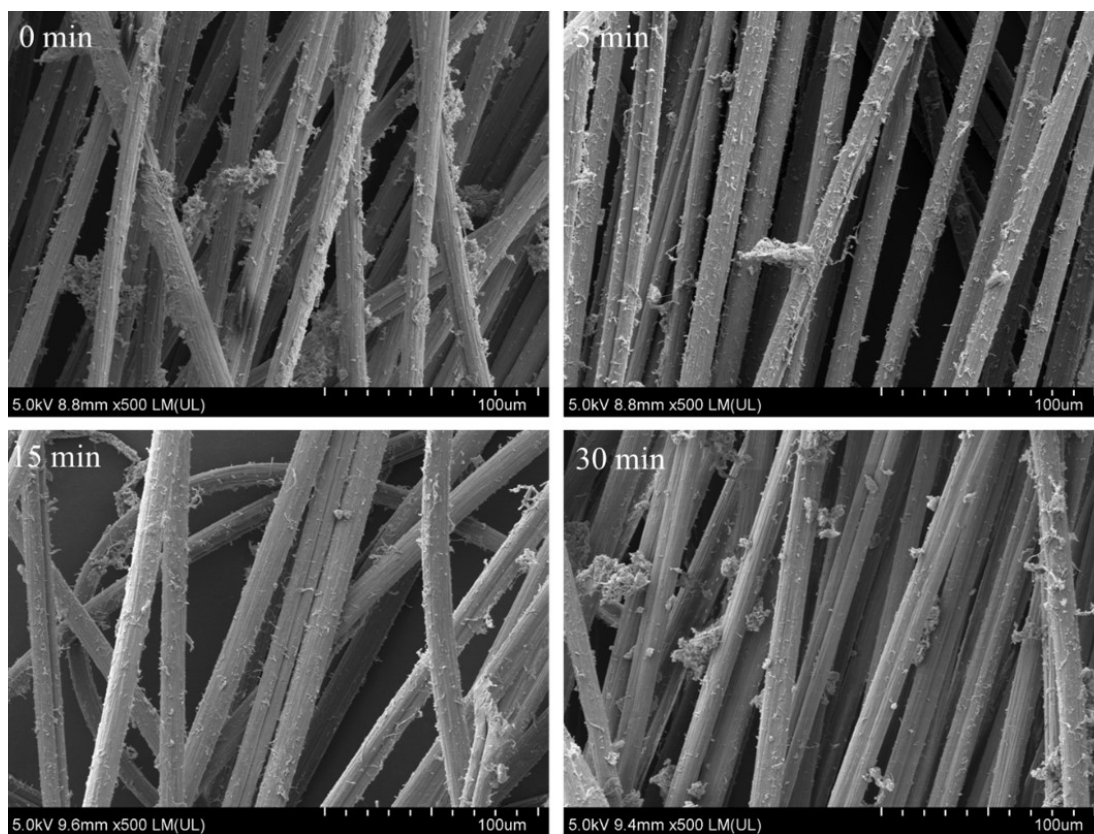

**Fig. S3.** Effect of treating time on SEM images of *V. alginolyticus* on PAO surface. 6.0 mg PAO was pre-balanced with 30 mL  $1.0 \times 10^8$  CFU/mL *V. alginolyticus* PBS solution for 24 h.

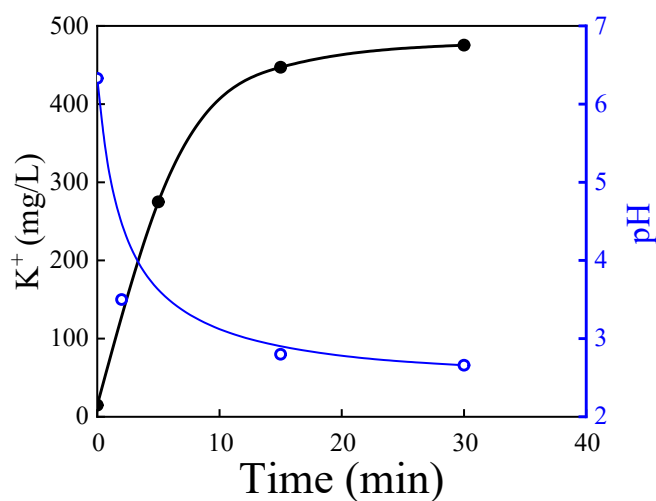

**Fig. S4.** Effect of treating time on  $K^+$  concentration and pH value in PBS solution.  $pH_{\text{initial}} = 8.2 \pm 0.1$ ,  $C[V. alginolyticus] = 1.0 \times 10^8$  CFU/mL.

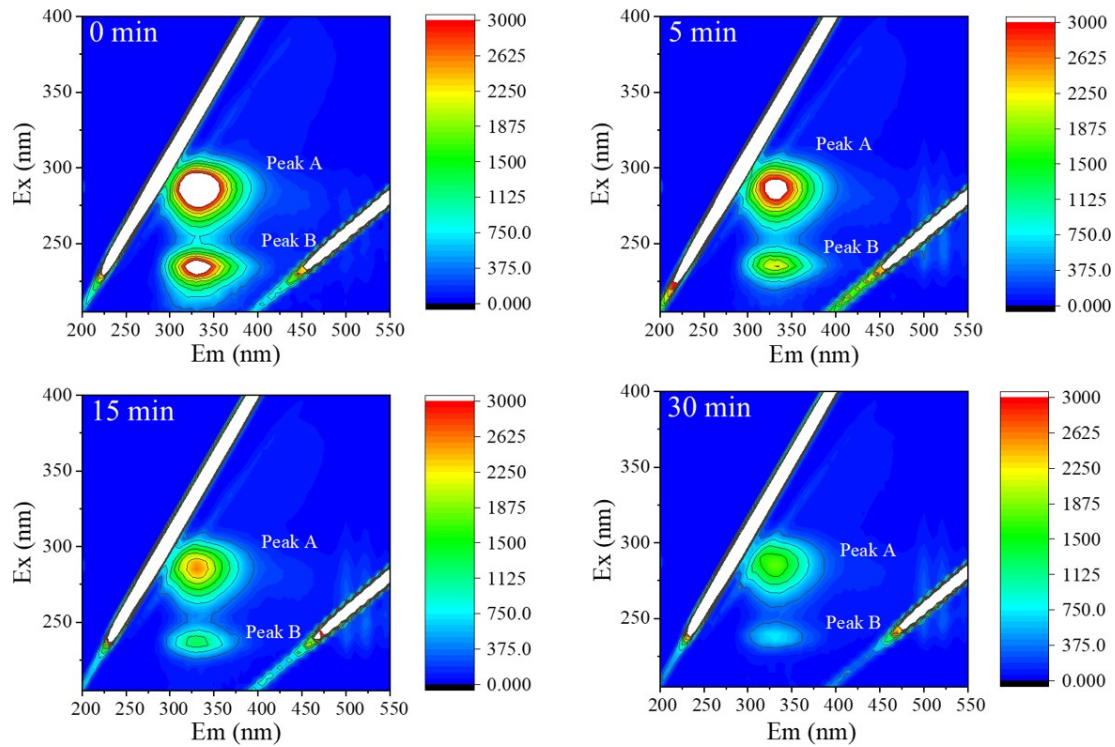

**Fig. S5.** Effect of treating time on 3D-EEM spectra of *V. alginolyticus* EPS.  $C[V. alginolyticus] = 1.0 \times 10^8$  CFU/mL,  $C[U(VI)] = 2.0 \times 10^{-5}$  mol/L.

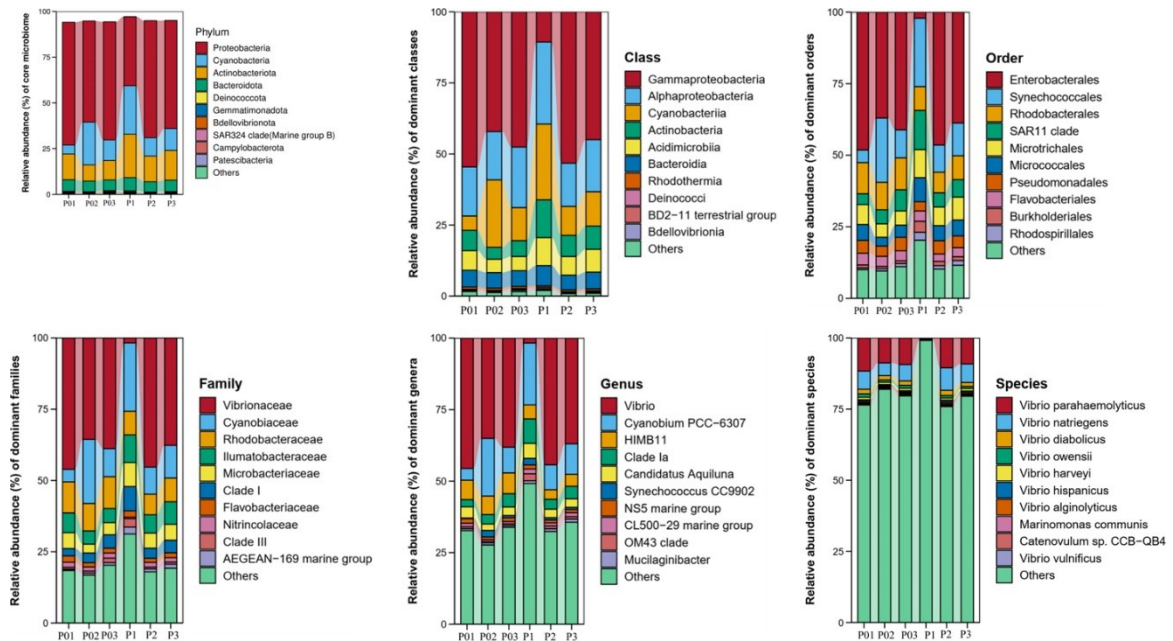

**Fig. S6.** Relative abundance of seawater before (P01-03) and after plasma treatment (P1-3). Treating time: 30 min.

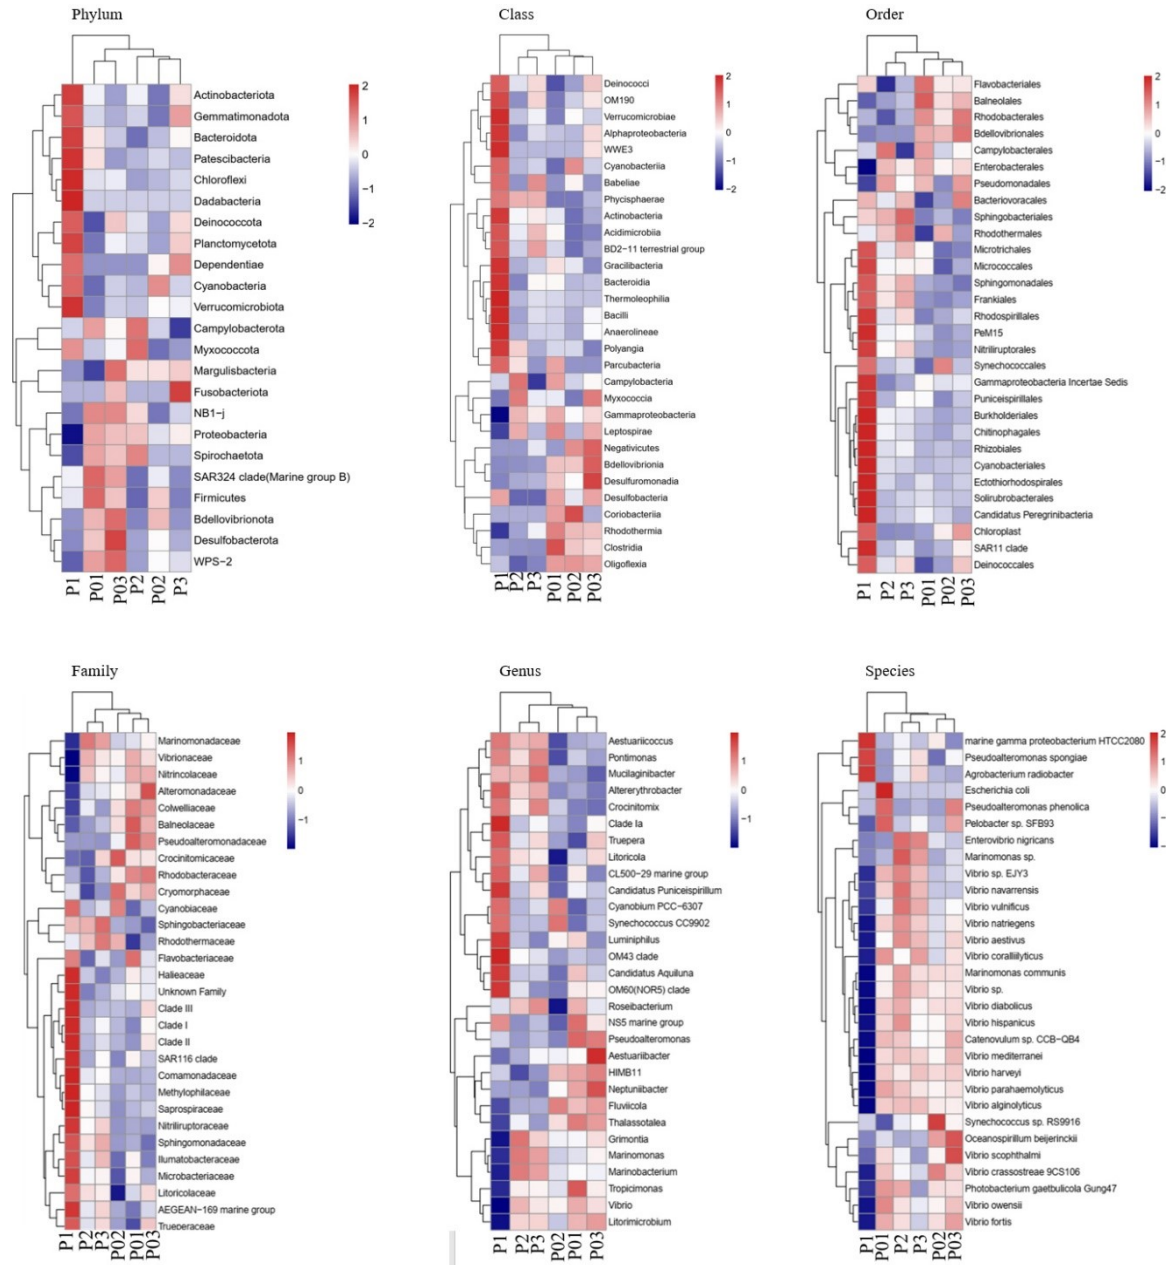

**Fig. S7.** Heatmap of dominant species in seawater before (P01-03) and after plasma treatment (P1-3). Treating time: 30 min.
